# Supplementary material for: Based on Tau PET Radiomics Analysis for the Classification of Alzheimer’s Disease and Mild Cognitive Impairment
Source: MDPI journal article supplement (doi:10.3390/brainsci13020367), 2023-02-20
Supplement: s1 [file s1]

**Table S1.** 60 ROIs with significant differences between AD and NC from ANDI training datasets on AAL atlas.

| Brain region(AAL) | Voxels size | Cluster MNI <sup>k</sup> |        |        |
|-------------------|-------------|--------------------------|--------|--------|
|                   |             | X (mm)                   | Y (mm) | Z (mm) |
| Temporal_Mid_L    | 4414        | -6                       | -22    | -54    |
| Temporal_Mid_R    | 3642        | -6                       | -22    | -54    |
| Frontal_Mid_R     | 3417        | -6                       | -22    | -54    |
| Frontal_Mid_L     | 3366        | -6                       | -22    | -54    |
| Occipital_Mid_L   | 3157        | -6                       | -22    | -54    |
| Temporal_Inf_R    | 3130        | -6                       | -22    | -54    |
| Temporal_Inf_L    | 3100        | -6                       | -22    | -54    |
| Precuneus_L       | 2795        | -6                       | -22    | -54    |
| Precuneus_R       | 2702        | -6                       | -22    | -54    |
| Fusiform_R        | 2422        | -6                       | -22    | -54    |
| Frontal_Sup_R     | 2335        | -6                       | -22    | -54    |
| Fusiform_L        | 2208        | -6                       | -22    | -54    |
| Parietal_Inf_L    | 2107        | -6                       | -22    | -54    |
| Temporal_Sup_R    | 2057        | -6                       | -22    | -54    |
| Temporal_Sup_L    | 2043        | -6                       | -22    | -54    |
| Frontal_Sup_L     | 2031        | -6                       | -22    | -54    |
| Lingual_R         | 1974        | -6                       | -22    | -54    |
| Lingual_L         | 1875        | -6                       | -22    | -54    |
| Occipital_Mid_R   | 1778        | -6                       | -22    | -54    |
| Frontal_Inf_Tri_L | 1654        | -6                       | -22    | -54    |
| Calcarine_L       | 1596        | -6                       | -22    | -54    |
| Precentral_L      | 1483        | -6                       | -22    | -54    |
| SupraMarginal_R   | 1469        | -6                       | -22    | -54    |
| Angular_R         | 1368        | -6                       | -22    | -54    |
| Angular_L         | 1350        | -6                       | -22    | -54    |

|                     |      |    |     |     |
|---------------------|------|----|-----|-----|
| Parietal_Sup_L      | 1348 | -6 | -22 | -54 |
| Calcarine_R         | 1314 | -6 | -22 | -54 |
| Cuneus_R            | 1312 | -6 | -22 | -54 |
| Cuneus_L            | 1305 | -6 | -22 | -54 |
| Frontal_Inf_Tri_R   | 1250 | -6 | -22 | -54 |
| Occipital_Sup_R     | 1189 | -6 | -22 | -54 |
| Parietal_Sup_R      | 1096 | -6 | -22 | -54 |
| SupraMarginal_L     | 1070 | -6 | -22 | -54 |
| Occipital_Sup_L     | 1044 | -6 | -22 | -54 |
| Parietal_Inf_R      | 990  | -6 | -22 | -54 |
| Postcentral_L       | 982  | -6 | -22 | -54 |
| Postcentral_R       | 977  | -6 | -22 | -54 |
| Insula_R            | 960  | -6 | -22 | -54 |
| Insula_L            | 958  | -6 | -22 | -54 |
| Cingulum_Ant_L      | 945  | -6 | -22 | -54 |
| Cingulum_Ant_R      | 936  | -6 | -22 | -54 |
| Cingulum_Mid_R      | 929  | -6 | -22 | -54 |
| Cingulum_Mid_L      | 924  | -6 | -22 | -54 |
| Frontal_Inf_Oper_R  | 923  | -6 | -22 | -54 |
| Frontal_Inf_Orb_L   | 844  | -6 | -22 | -54 |
| Precentral_R        | 838  | -6 | -22 | -54 |
| Supp_Motor_Area_R   | 792  | -6 | -22 | -54 |
| Frontal_Inf_Orb_R   | 753  | -6 | -22 | -54 |
| Frontal_Inf_Oper_L  | 696  | -6 | -22 | -54 |
| Supp_Motor_Area_L   | 649  | -6 | -22 | -54 |
| Frontal_Med_Orb_R   | 599  | -6 | -22 | -54 |
| Frontal_Mid_Orb_L   | 560  | -6 | -22 | -54 |
| Temporal_Pole_Sup_L | 558  | -6 | -22 | -54 |
| Temporal_Pole_Sup_R | 549  | -6 | -22 | -54 |

|                 |     |     |     |     |
|-----------------|-----|-----|-----|-----|
| Rolandic_Oper_L | 522 | -6  | -22 | -54 |
| Rolandic_Oper_R | 513 | -6  | -22 | -54 |
| Caudate_L       | 760 | -12 | -6  | -8  |
| Caudate_R       | 574 | -12 | -6  | -8  |
| Thalamus_L      | 565 | -12 | -6  | -8  |
| Thalamus_R      | 515 | -12 | -6  | -8  |

**Table S2.**Selected features from ADNI cohorts.

| Brain region(AAL)   | Global features | Texture features       |       |          |                                |
|---------------------|-----------------|------------------------|-------|----------|--------------------------------|
|                     |                 | GLCM                   | GLRLM | GLSZM    | NGTDM                          |
| Cingulum_Mid_L      |                 | Contrast               |       | LZE      | Complexity, Contrast           |
| Occipital_Mid_L     |                 |                        |       | LZE      |                                |
| Occipital_Mid_R     |                 | Entropy, Dissimilarity |       | LZE, GLN | Complexity                     |
| Fusiform_L          |                 |                        |       | GLN      |                                |
| Fusiform_R          |                 | Entropy                | SRE   | GLN      |                                |
| Parietal_Inf_L      |                 |                        |       |          | Complexity                     |
| Angular_R           |                 |                        |       | GLN      |                                |
| Temporal_Sup_L      |                 |                        |       | GLN, ZP  |                                |
| Temporal_Sup_R      |                 |                        |       | LZE, GLN |                                |
| Temporal_Pole_Sup_R | Kurtosis        |                        |       | LZE      | Complexity                     |
| Temporal_Inf_L      |                 |                        |       | LZE, GLN | Complexity                     |
| Temporal_Inf_R      |                 |                        |       | LZE, GLN | Contrast, Busyness, Complexity |

LZE: Large Zone Emphasis; GLN: Gray-Level Nonuniformity; SRE :Short Run Emphasis; ZP: Zone Percentage
